# Supplementary material for: Nursing students’ experiences with faculty incivility in the clinical education context: a qualitative systematic review and meta-synthesis
Source: PubMed Central journal article supplement — BMJ Open. 2019 Mar 1;9(2):e024383. doi: 10.1136/bmjopen-2018-024383 (PMC6398780; doi:10.1136/bmjopen-2018-024383), 2019-03-01
Supplement: bmjopen-2018-024383supp002.pdf [file bmjopen-2018-024383supp002.pdf]

1 **Appendix II:** Search strategy for PubMed (MEDLINE)

2 Date: 2018.01.06

3 Database: PubMed (MEDLINE)

| Set # |                                                                                                                                                                                                                                                                                                                                                                                                                                                                                          | Results |
|-------|------------------------------------------------------------------------------------------------------------------------------------------------------------------------------------------------------------------------------------------------------------------------------------------------------------------------------------------------------------------------------------------------------------------------------------------------------------------------------------------|---------|
| 1     | incivility [MeSH] OR bullying[MeSH] OR "workplace violence" [MeSH] OR incivilit*[tiab] OR bully[tiab] OR uncivil[tiab] or aggression*[tiab] or harass* [tiab] OR mob [tiab] mobs [tiab] OR mobbing [tiab] OR victimiz* [tiab] OR ill-treat*[tiab] or abuse*[tiab] OR [tiab] OR oppress*[tiab] OR "horizontal violence"[tiab] OR "lateral violence" [tiab] OR disruptive[tiab] OR mistreat*[tiab] OR dilemma*[tiab] OR distress*[tiab] OR violen*[tiab] OR "nurses eat their young"[tiab] | 12207   |
| 2     | nurse [MeSH] OR nurs*[tiab] OR health[tiab]                                                                                                                                                                                                                                                                                                                                                                                                                                              | 442373  |
| 3     | student[MeSH] OR student*[tiab] OR undergraduate* [tiab] OR graduate* [tiab]                                                                                                                                                                                                                                                                                                                                                                                                             | 298999  |
| 4     | Hospitals[MeSH] OR workplace[MeSH] OR Hospital*[tiab] OR clinic [tiab] clinical [tiab] OR workplace*[tiab] OR work[tiab] OR "job site*" [tiab]                                                                                                                                                                                                                                                                                                                                           | 1144910 |
| 5     | #1 AND #2 AND #3 AND #4                                                                                                                                                                                                                                                                                                                                                                                                                                                                  | 96      |

4

5
